# Supplementary material for: Superparamagnetic versus blocked states in aggregates of Fe3−xO4 nanoparticles studied by MFM
Source: Royal Society of Chemistry journal article supplement (doi:10.1039/c5nr04424c), 2015-01-01
Supplement: c5nr04424c1.pdf [file c5nr04424c1.pdf]

## Supporting Information

### Superparamagnetic versus blocked states in aggregates of $\text{Fe}_{3-x}\text{O}_4$ nanoparticles studied by MFM

Carlos Moya,<sup>\*,‡a</sup> Óscar Iglesias-Freire,<sup>‡b,c</sup> Xavier Batlle,<sup>a</sup> Amilcar Labarta<sup>a</sup> and  
Agustina Asenjo<sup>b</sup>

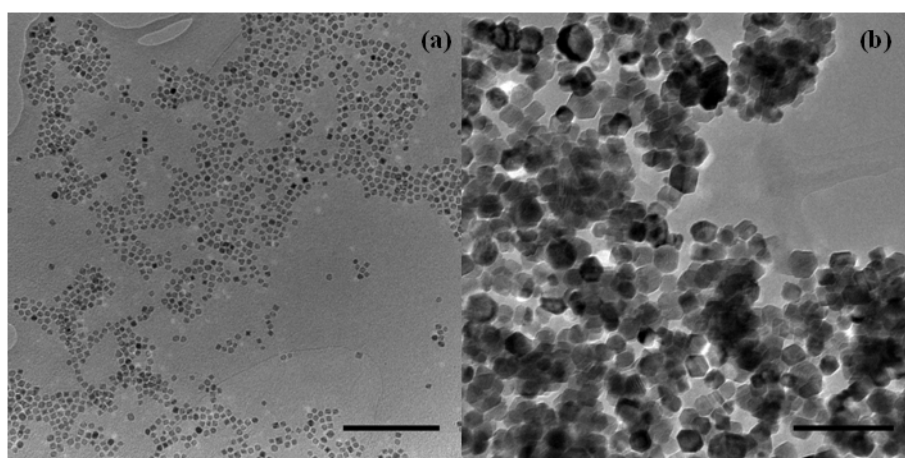

**Figure S1.** TEM images at low resolution. (a) 11 nm NPs and (b) 49 nm NPs. Scale bars correspond to 200 nm.

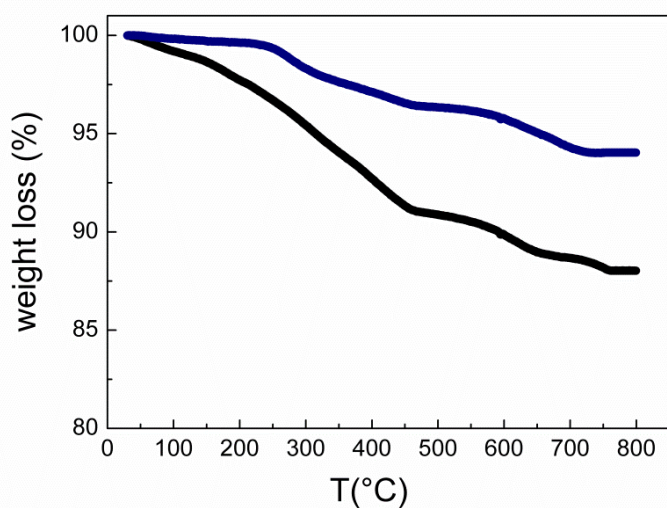

**Figure S2.** Thermogravimetric curves. Solid black line corresponds to 49 nm NPs and solid blue line corresponds to 11 nm NPs.

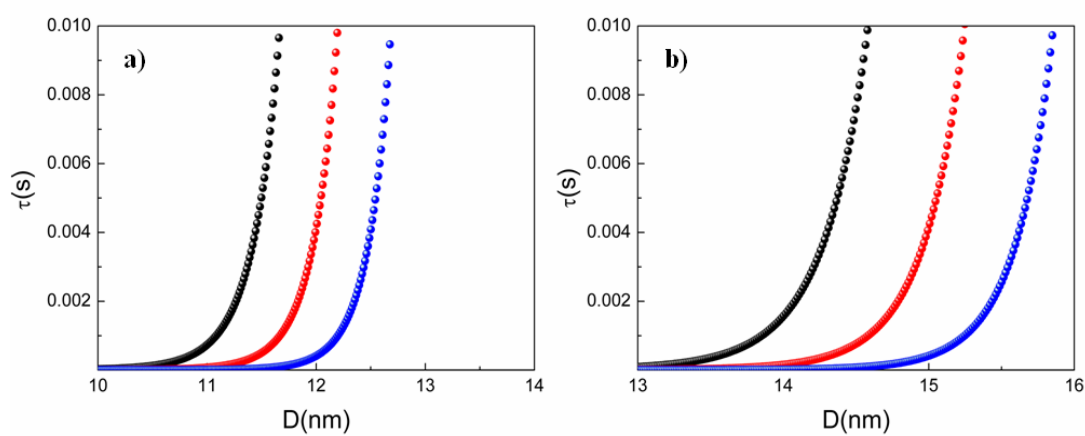

**Figure S3.** Calculated relaxation time from Arrhenius law for a single  $\text{Fe}_{3-x}\text{O}_4$  NP following Néel relaxation. (a)  $K_v = 2.1 \cdot 10^{-5} \text{ erg cm}^{-3}$  and (b)  $K_v = 4.1 \cdot 10^{-5} \text{ erg cm}^{-3}$ .

The values of the characteristic attempt time,  $\tau_0$ , used in Arrhenius law are as follows.

Black spheres:  $10^{-9}$ s, red spheres:  $10^{-10}$ s and blue spheres:  $10^{-11}$ s.

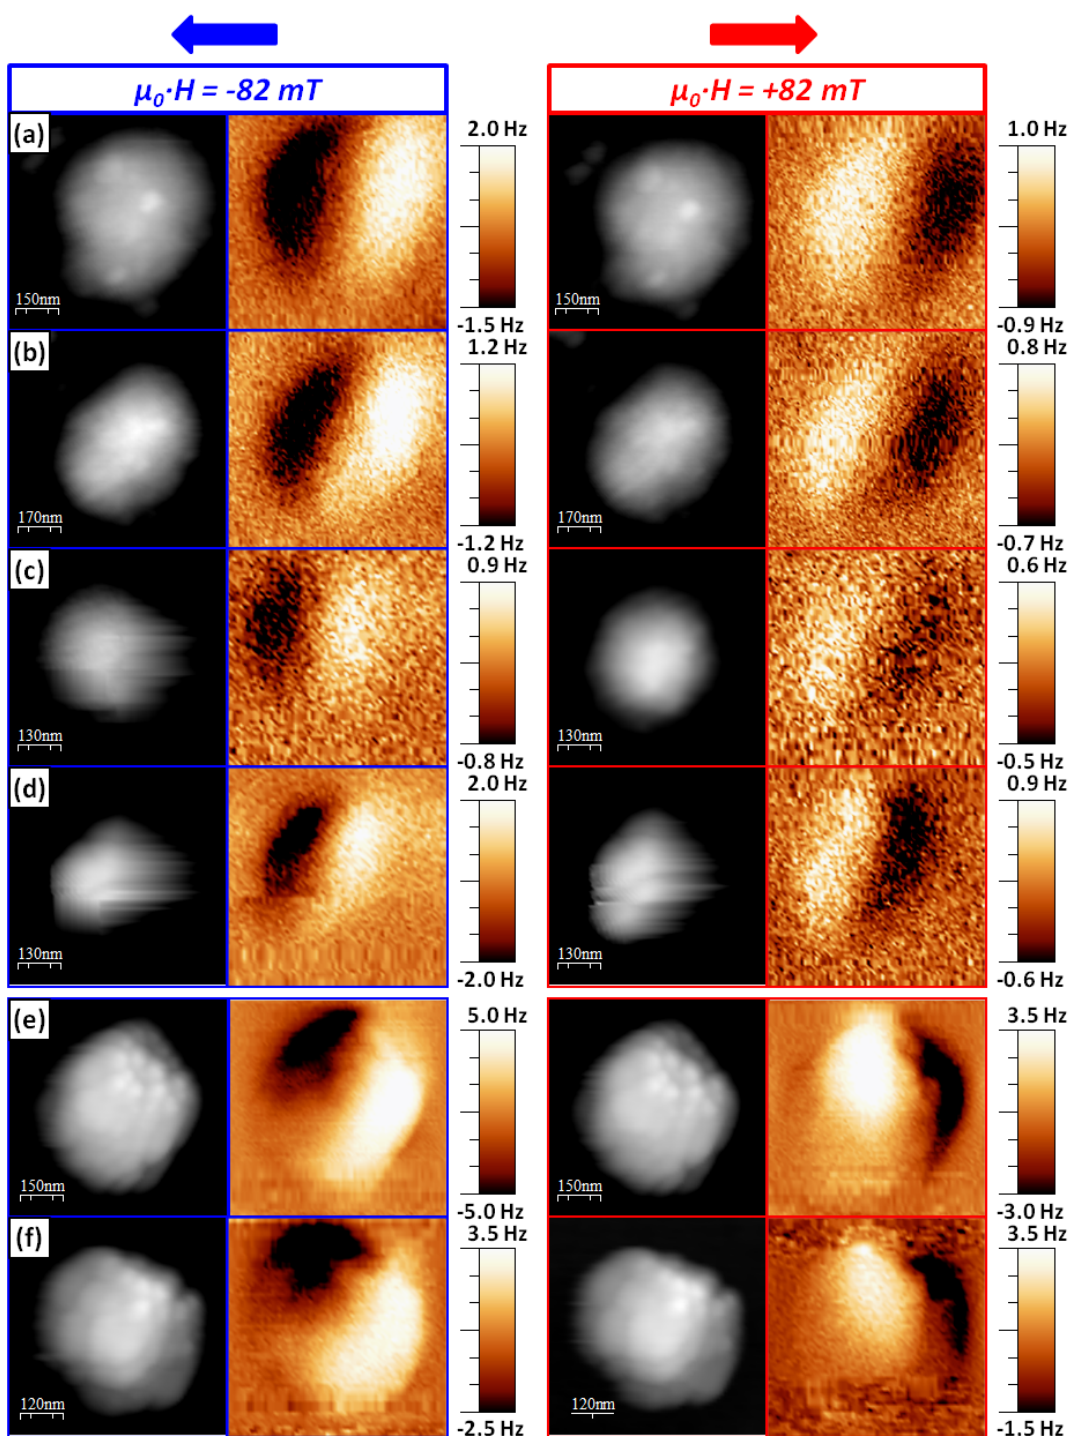

**Figure S4.** The exact same location for the topographic and MFM images of the aggregates of NPs shown in Figure 4 ((a)-(d) for R11 and (e)-(f) for R49).
